# Supplementary material for: Hot Water Treatment Causes Lasting Alteration to the Grapevine (Vitis vinifera L.) Mycobiome and Reduces Pathogenic Species Causing Grapevine Trunk Diseases
Source: MDPI journal article supplement (doi:10.3390/jof8050485), 2022-05-06
Supplement: s1 [file s1]

## Supplementary Materials

**Table S1.** Contribution ( $r^2$ ) of nursery, variety and treatment to variation in chlorophyll in graft unions. Annotation next to the numbers indicates significance level: \*\* < 0.01, n.s. = not significant (>0.05).

| Factor     | Graft Unions ( $r^2$ ) |
|------------|------------------------|
| Nursery    | 0.089 **               |
| Variety    | 0.028 n.s.             |
| Treatment  | 0.000 n.s.             |
| Full model | 0.13 n.s.              |

**Table S2.** Indicator species for control and HWT plants in **(a)** graft union and **(b)** root collars for all OTUs. Graft unions and root collars were analyzed separately by variety and rootstock, respectively. Correlation values (stat) and the statistical significance of the correlation (p-values) are reported. GTD-related indicator species are marked with a cross (†) and biocontrol species are marked with an asterisk (\*).

### a. Graft unions: control vs HWT

| 50 species associated with control plants |       |         |              |
|-------------------------------------------|-------|---------|--------------|
| Indicator Species                         | stat  | p value | significance |
| <i>Acaromyces ingoldii</i>                | 0.58  | 0.001   | ***          |
| <i>Acrocalymma</i> sp._3                  | 0.26  | 0.03    | *            |
| <i>Bionectria byssicola</i> _1            | 0.56  | 0.011   | *            |
| <i>Cadophora luteo-olivacea</i> †         | 0.826 | 0.001   | ***          |
| <i>Cadophora luteo-olivacea</i> †         | 0.387 | 0.003   | **           |
| <i>Cadophora</i> sp. †                    | 0.767 | 0.001   | ***          |
| <i>Cadophora</i> sp._1 †                  | 0.368 | 0.001   | ***          |
| <i>Calloria</i> sp.                       | 0.449 | 0.002   | **           |
| <i>Clonostachys</i> sp.                   | 0.483 | 0.026   | *            |
| <i>Cortinarius</i> sp.                    | 0.424 | 0.046   | *            |
| <i>Cystobasidium</i> sp._2                | 0.26  | 0.029   | *            |
| <i>Devriesia</i> sp._1                    | 0.309 | 0.015   | *            |
| <i>Diaporthe</i> sp._1 †                  | 0.654 | 0.001   | ***          |
| <i>Diaporthe</i> sp._2 †                  | 0.26  | 0.03    | *            |
| <i>Hannaella luteola</i>                  | 0.385 | 0.003   | **           |
| <i>Leptosphaeria</i> sp._5                | 0.778 | 0.005   | **           |
| <i>Lophiostoma</i> sp.                    | 0.801 | 0.002   | **           |
| <i>Lophiostoma</i> sp._15                 | 0.26  | 0.027   | *            |
| <i>Lophiostoma</i> sp._4                  | 0.329 | 0.002   | **           |
| <i>Lophiostoma</i> sp._6                  | 0.384 | 0.014   | *            |
| <i>Meira nashicola</i>                    | 0.26  | 0.031   | *            |
| <i>Meira</i> sp.                          | 0.553 | 0.004   | **           |
| <i>Mycoarthris corallina</i>              | 0.337 | 0.007   | **           |

| <i>Niesslia</i> sp._4                        | 0.666       | 0.001          | ***                 |
|----------------------------------------------|-------------|----------------|---------------------|
| <i>Niesslia</i> sp._5                        | 0.377       | 0.021          | *                   |
| <i>Occultifur</i> sp.                        | 0.26        | 0.033          | *                   |
| <i>Ophiobolus</i> sp.                        | 0.56        | 0.001          | ***                 |
| <i>Pyrenochaeta</i> sp.                      | 0.458       | 0.038          | *                   |
| <i>Rosellinia</i> sp.                        | 0.359       | 0.011          | *                   |
| <i>Rosellinia</i> sp._1                      | 0.285       | 0.012          | *                   |
| <i>Sarocladium strictum</i> _1               | 0.54        | 0.05           | *                   |
| <i>Sebacina</i> sp.                          | 0.259       | 0.045          | *                   |
| <i>Stagonospora</i> sp._4                    | 0.572       | 0.008          | **                  |
| <i>unknown</i> _109                          | 0.329       | 0.005          | **                  |
| <i>unknown</i> _117                          | 0.462       | 0.001          | ***                 |
| <i>unknown</i> _121                          | 0.329       | 0.005          | **                  |
| <i>unknown</i> _17                           | 0.432       | 0.005          | **                  |
| <i>unknown</i> _30                           | 0.406       | 0.001          | ***                 |
| <i>unknown</i> _31                           | 0.26        | 0.03           | *                   |
| <i>unknown</i> _32                           | 0.34        | 0.015          | *                   |
| <i>unknown</i> _33                           | 0.444       | 0.005          | **                  |
| <i>unknown</i> _39                           | 0.535       | 0.001          | ***                 |
| <i>unknown</i> _53                           | 0.546       | 0.004          | **                  |
| <i>unknown</i> _61                           | 0.349       | 0.026          | *                   |
| <i>unknown</i> _77                           | 0.251       | 0.039          | *                   |
| <i>unknown</i> _84                           | 0.338       | 0.011          | *                   |
| <i>unknown</i> _88                           | 0.377       | 0.015          | *                   |
| <i>unknown</i> _9                            | 0.285       | 0.014          | *                   |
| <i>unknown</i> _98                           | 0.582       | 0.008          | **                  |
| <i>Vishniacozyma</i> sp._2 *                 | 0.26        | 0.03           | *                   |
| <b>38 species associated with HWT plants</b> |             |                |                     |
| <b>Indicator species</b>                     | <b>stat</b> | <b>p value</b> | <b>significance</b> |
| <i>Acremonium</i> sp._1 †                    | 0.648       | 0.007          | **                  |
| <i>Acremonium</i> sp._12 †                   | 0.426       | 0.024          | *                   |
| <i>Acremonium</i> sp._13 †                   | 0.786       | 0.001          | ***                 |
| <i>Acremonium</i> sp._14 †                   | 0.658       | 0.001          | ***                 |
| <i>Acremonium</i> sp._15 †                   | 0.724       | 0.001          | ***                 |
| <i>Acremonium</i> sp._5 †                    | 0.401       | 0.013          | *                   |
| <i>Articulospora</i> sp.                     | 0.424       | 0.002          | **                  |
| <i>Cystobasidium laryngis</i>                | 0.55        | 0.001          | ***                 |
| <i>Cystobasidium lysinophilum</i>            | 0.762       | 0.001          | ***                 |
| <i>Cystobasidium slooffiae</i> _1            | 0.695       | 0.001          | ***                 |
| <i>Cystobasidium</i> sp.                     | 0.329       | 0.047          | *                   |
| <i>Entyloma</i> sp.                          | 0.557       | 0.031          | *                   |
| <i>Entyloma</i> sp._1                        | 0.503       | 0.044          | *                   |
| <i>Fusarium</i> sp._10                       | 0.4         | 0.002          | **                  |
| <i>Fusarium</i> sp._12                       | 0.315       | 0.017          | *                   |
| <i>Fusarium</i> sp._20                       | 0.527       | 0.001          | ***                 |
| <i>Fusarium</i> sp._22                       | 0.786       | 0.004          | **                  |

|                            |       |       |     |
|----------------------------|-------|-------|-----|
| <i>Fusarium</i> sp._3      | 0.823 | 0.001 | *** |
| <i>Fusarium</i> sp._5      | 0.423 | 0.04  | *   |
| <i>Fusarium</i> sp._6      | 0.689 | 0.001 | *** |
| <i>Fusarium</i> sp._9      | 0.283 | 0.026 | *   |
| <i>Microstroma</i> sp.     | 0.415 | 0.017 | *   |
| <i>Nectria</i> sp._1 †     | 0.367 | 0.037 | *   |
| <i>Phaeosphaeria</i> sp._3 | 0.367 | 0.04  | *   |
| <i>Phoma</i> sp. †         | 0.417 | 0.022 | *   |
| <i>Phoma</i> sp._1 †       | 0.358 | 0.021 | *   |
| <i>Quambalaria</i> sp.     | 0.342 | 0.026 | *   |
| <i>Sporisorium</i> sp.     | 0.414 | 0.003 | **  |
| <i>Stagonospora</i> sp.    | 0.526 | 0.004 | **  |
| <i>Stagonospora</i> sp._1  | 0.499 | 0.024 | *   |
| <i>Stagonospora</i> sp._5  | 0.671 | 0.001 | *** |
| Unknown                    | 0.473 | 0.001 | *** |
| unknown_1                  | 0.32  | 0.015 | *   |
| unknown_106                | 0.416 | 0.001 | *** |
| unknown_11                 | 0.443 | 0.004 | **  |
| unknown_22                 | 0.416 | 0.001 | *** |
| unknown_57                 | 0.572 | 0.001 | *** |
| unknown_70                 | 0.478 | 0.029 | *   |

**b. Root collars: control vs HWT**

| 23 species associated with control plants |       |         |              |
|-------------------------------------------|-------|---------|--------------|
| Indicator species                         | stat  | p value | significance |
| <i>Acaromyces ingoldii</i>                | 0.494 | 0.0213  | *            |
| <i>Bionectria byssicola</i>               | 0.698 | 0.0409  | *            |
| <i>Bionectria byssicola</i> _1            | 0.315 | 0.0451  | *            |
| <i>Cercophora samala</i>                  | 0.309 | 0.0285  | *            |
| <i>Cystofilobasidium macerans</i>         | 0.603 | 0.0324  | *            |
| <i>Exophiala</i> sp._1                    | 0.603 | 0.0002  | ***          |
| <i>Leptosphaeria</i> sp._5                | 0.761 | 0.0063  | **           |
| <i>Meira</i> sp._1                        | 0.296 | 0.025   | *            |
| <i>Ophiobolus</i> sp.                     | 0.504 | 0.0094  | **           |
| <i>Phaeomoniella chlamydospora</i> _3 †   | 0.715 | 0.0293  | *            |
| <i>Phaeomoniella chlamydospora</i> _4 †   | 0.327 | 0.0052  | **           |
| <i>Phaeomoniella chlamydospora</i> _5 †   | 0.322 | 0.0096  | **           |
| <i>Phaeomoniella</i> sp. †                | 0.359 | 0.0163  | *            |
| <i>Phaeosphaeria</i> sp._4                | 0.375 | 0.0419  | *            |
| <i>Rhizoctonia</i> sp.                    | 0.551 | 0.0001  | ***          |
| <i>Serendipita</i> sp.                    | 0.567 | 0.0122  | *            |
| <i>Stagonospora</i> sp._4                 | 0.551 | 0.0106  | *            |
| <i>Thysanorea asiatica</i>                | 0.487 | 0.0001  | ***          |
| unknown_101                               | 0.497 | 0.0003  | ***          |

| <i>unknown_108</i>                           | 0.306 | 0.0142  | *            |
|----------------------------------------------|-------|---------|--------------|
| <i>unknown_3</i>                             | 0.353 | 0.0472  | *            |
| <i>unknown_79</i>                            | 0.283 | 0.0296  | *            |
| <i>unknown_89</i>                            | 0.323 | 0.0208  | *            |
| <b>29 species associated with HWT plants</b> |       |         |              |
| Indicator species                            | stat  | p value | significance |
| <i>Cercophora</i> sp._1                      | 0.264 | 0.0255  | *            |
| <i>Chaetomium</i> sp._12                     | 0.513 | 0.0056  | **           |
| <i>Cylindrocarpon</i> sp._4 †                | 0.51  | 0.0467  | *            |
| <i>Cystobasidium</i> sp._2                   | 0.283 | 0.0464  | *            |
| <i>Fusarium</i> sp._13                       | 0.635 | 0.0131  | *            |
| <i>Fusarium</i> sp._15                       | 0.422 | 0.0136  | *            |
| <i>Fusarium</i> sp._17                       | 0.319 | 0.0288  | *            |
| <i>Fusarium</i> sp._2                        | 0.289 | 0.0136  | *            |
| <i>Fusarium</i> sp._6                        | 0.421 | 0.0015  | **           |
| <i>Lophiostoma</i> sp.*                      | 0.759 | 0.0004  | ***          |
| <i>Lophiostoma</i> sp._10*                   | 0.636 | 0.0026  | **           |
| <i>Lophiostoma</i> sp._11*                   | 0.686 | 0.0001  | ***          |
| <i>Minutisphaera aspera</i>                  | 0.697 | 0.0125  | *            |
| <i>Minutisphaera</i> sp._1                   | 0.403 | 0.0041  | **           |
| <i>Phaeosphaeria</i> sp._2                   | 0.335 | 0.0259  | *            |
| <i>Phoma</i> sp._1 †                         | 0.351 | 0.0335  | *            |
| <i>Symmetrospora symmetrica</i>              | 0.275 | 0.0271  | *            |
| <i>Thelonectria olida</i> †                  | 0.453 | 0.001   | ***          |
| <i>Thelonectria</i> sp. †                    | 0.548 | 0.0006  | ***          |
| <i>unknown_107</i>                           | 0.46  | 0.0215  | *            |
| <i>unknown_119</i>                           | 0.363 | 0.002   | **           |
| <i>unknown_16</i>                            | 0.403 | 0.0139  | *            |
| <i>unknown_28</i>                            | 0.42  | 0.0073  | **           |
| <i>unknown_38</i>                            | 0.417 | 0.0006  | ***          |
| <i>unknown_4</i>                             | 0.413 | 0.0208  | *            |
| <i>unknown_45</i>                            | 0.427 | 0.0293  | *            |
| <i>unknown_6</i>                             | 0.376 | 0.0123  | *            |
| <i>unknown_62</i>                            | 0.405 | 0.0301  | *            |
| <i>unknown_96</i>                            | 0.533 | 0.0003  | ***          |

**Table S3.** Indicator species for control and HWT plants in **(a)** Nursery I and **(b)** Nursery II. Nurseries were analyzed separately. Correlation values (stat) and the statistical significance of the correlation (p-values) are reported. GTD-related indicator species are marked in bold and biocontrol species are marked with an asterisk (\*).

**a. Nursery I**

| <b>7 species associated with control plants</b> |       |         |              |
|-------------------------------------------------|-------|---------|--------------|
| Indicator species                               | stat  | p value | significance |
| <i>Cadophora luteo-olivacea</i> _2 †            | 0.854 | 0.0001  | ***          |
| <i>Cadophora</i> sp. †                          | 0.766 | 0.0008  | ***          |

|                                              |       |        |     |
|----------------------------------------------|-------|--------|-----|
| <i>Cortinarius</i> sp.                       | 0.483 | 0.0339 | *   |
| <i>Diaporthe</i> sp._1 †                     | 0.782 | 0.0025 | **  |
| <i>Lophiostoma</i> sp.*                      | 0.847 | 0.0004 | *** |
| <i>Niesslia</i> sp._4                        | 0.575 | 0.0152 | *   |
| <i>Stagonospora</i> sp._4                    | 0.65  | 0.0072 | **  |
| <b>10 species associated with HWT plants</b> |       |        |     |
| <i>Acremonium</i> sp._13 †                   | 0.818 | 0.0012 | **  |
| <i>Acremonium</i> sp._15 †                   | 0.771 | 0.0028 | **  |
| <i>Alternaria</i> sp._6*                     | 0.767 | 0.0289 | *   |
| <i>Cystobasidium lysinophilum</i>            | 0.789 | 0.0009 | *** |
| <i>Cystobasidium slooffiae</i> _1            | 0.692 | 0.0012 | **  |
| <i>Fusarium</i> sp._22                       | 0.888 | 0.0001 | *** |
| <i>Fusarium</i> sp._3                        | 0.923 | 0.0001 | *** |
| <i>Fusarium</i> sp._6                        | 0.853 | 0.0001 | *** |
| <i>Stagonospora</i> sp._5                    | 0.636 | 0.0372 | *   |

#### b. Nursery II

| <b>Nine species associated with control plants</b> |             |                |                     |
|----------------------------------------------------|-------------|----------------|---------------------|
| <b>Indicator species</b>                           | <b>stat</b> | <b>p value</b> | <b>significance</b> |
| <i>Acaromyces ingoldii</i>                         | 0.769       | 0.002          | **                  |
| <i>Cadophora luteo-olivacea</i> _2 †               | 0.797       | 0.0236         | *                   |
| <i>Cadophora</i> sp. †                             | 0.682       | 0.0474         | *                   |
| <i>Diaporthe</i> sp._1 †                           | 0.733       | 0.0084         | **                  |
| <i>Niesslia</i> sp._4                              | 0.679       | 0.0152         | *                   |
| <i>Ophiobolus</i> sp.                              | 0.656       | 0.0012         | **                  |
| <i>Stagonospora</i> sp._4                          | 0.5         | 0.0257         | *                   |
| <i>unknown</i> _53                                 | 0.777       | 0.0011         | **                  |
| <i>unknown</i> _98                                 | 0.689       | 0.0156         | *                   |
| <b>Five species associated with HWT plants</b>     |             |                |                     |
| <i>Acremonium</i> sp._13 †                         | 0.779       | 0.0486         | *                   |
| <i>Cystobasidium lysinophilum</i>                  | 0.743       | 0.0469         | *                   |
| <i>Cystobasidium slooffiae</i> _1                  | 0.757       | 0.0092         | **                  |
| <i>Fusarium</i> sp._3                              | 0.842       | 0.0011         | **                  |
| <i>Fusarium</i> sp._6                              | 0.649       | 0.0012         | **                  |

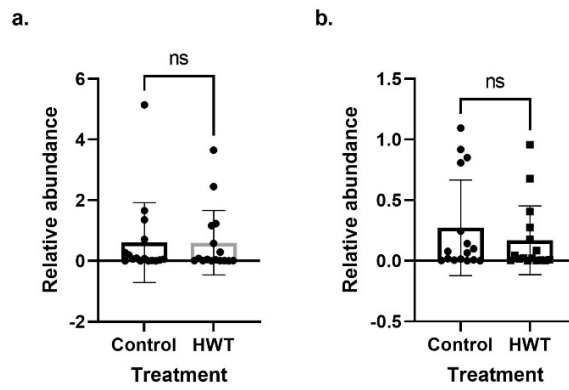

Figure S1. Relative abundance of GTD-related fungi in control and HWT-treated plants in (a) graft unions and (b) root collars.
